# Supplementary material
Source: publisher figshare collection journal article supplement (https://acs.figshare.com/ndownloader/files/9411058)
Supplement: Supplementary file 1 [file 9411058]

# **Electrochemical and Diffusional Investigation of $\text{Na}_2\text{Fe}^{\text{II}}\text{PO}_4\text{F}$ Fluorophosphate Sodium Insertion Material Obtained from $\text{Fe}^{\text{III}}$ Precursor**

Lalit Sharma,<sup>†</sup> Prasant Kumar Nayak,<sup>‡</sup> Ezequiel de la Llave,<sup>‡</sup> Haomin Chen,<sup>\$</sup>  
Stefan Adams,<sup>\$</sup> Doron Aurbach,<sup>‡</sup> and Prabeer Barpanda<sup>†,\*</sup>

<sup>†</sup> Faraday Materials Laboratory, Materials Research Center,  
Indian Institute of Science, C. V. Raman Avenue, Bangalore, 560012, India.

<sup>‡</sup> Department of Chemistry, Bar-Ilan University, Ramat-Gan 5290002, Israel.

<sup>\$</sup> Department of Materials Science and Engineering, National University of Singapore,  
9 Engineering Drive 1, Singapore 117575, Singapore.

\* author for correspondence

E-mail: [prabeer@mrc.iisc.ernet.in](mailto:prabeer@mrc.iisc.ernet.in)

Phone: +91-80 2293 2783; Fax: +91-80 2360 7316

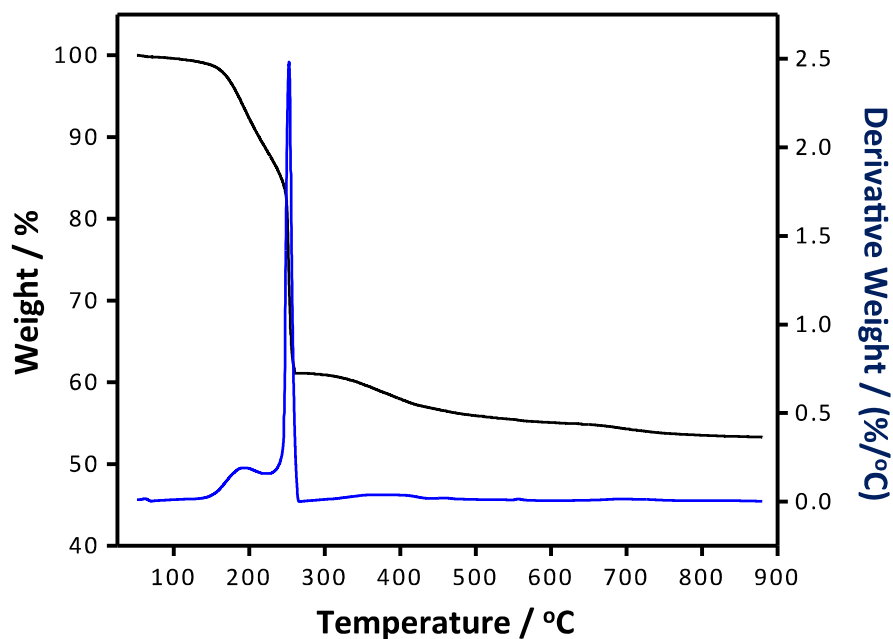

**Figure S1:** TGA plot of combustion ash (intermediate complex) obtained after combustion reaction of precursor solution upon heating at 120 °C. Sharp weight loss owing to the decomposition of combustion ash is noticed in the temperature range of 150-250 °C.

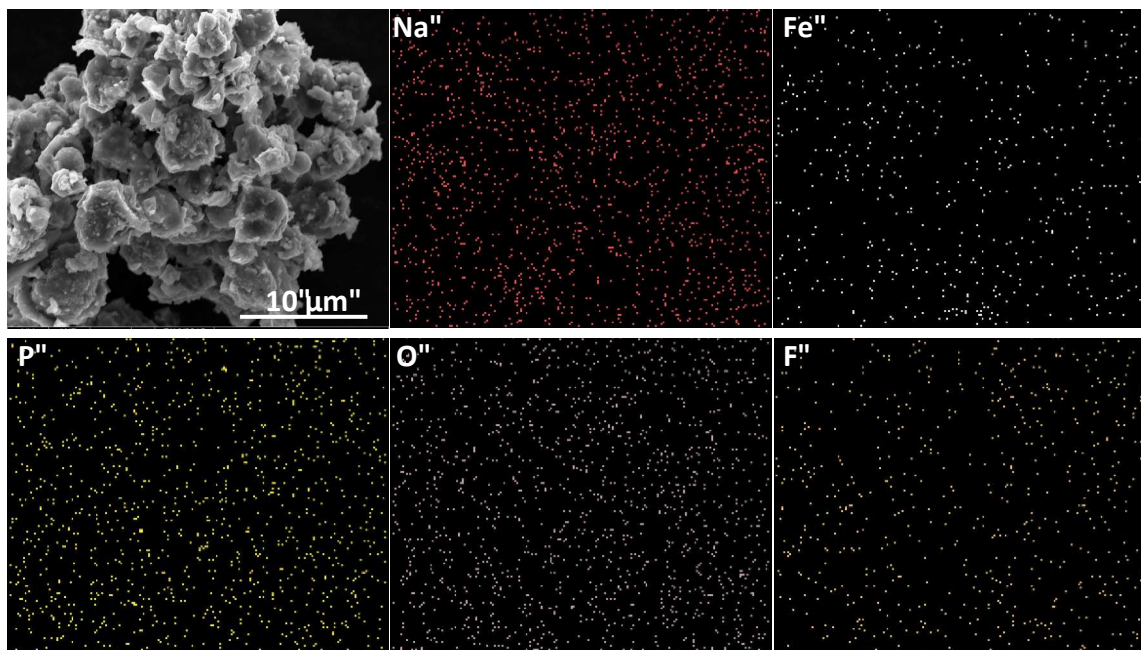

**Figure S2:** EDAX Spectra of Na<sub>2</sub>FePO<sub>4</sub>F showing uniform distribution of all elements.
